# Supplementary material for: A Response Surface Methodology (RSM) Approach for Optimizing the Attenuation of Human IgE-Reactivity to β-Lactoglobulin (β-Lg) by Hydrostatic High Pressure Processing
Source: MDPI journal article supplement (doi:10.3390/foods10081741), 2021-07-28
Supplement: s1 [file s1]

## Supplementary Materials

**Table S1.** One-way ANOVA analysis and Tukey's multiple comparisons test of IgG binding of  $\beta$ -Lg treated with 15 different HHP conditions. Only statically significant pairs are listed.

|                                   | df         | SS    | MS         | F              |
|-----------------------------------|------------|-------|------------|----------------|
| Treatment<br>(between treatments) | 14         | 16081 | 1149       | 10.12          |
| Residual (within treatments)      | 42         | 4769  | 113.5      | Significance F |
| Total                             | 56         | 20850 |            | <0.0001        |
|                                   | Mean diff. | q     | Adj.Pvalue |                |
| T1 vs. T4                         | 45.9       | 7.46  | 0.0004     |                |
| T1 vs. T5                         | 48.8       | 7.93  | 0.0001     |                |
| T1 vs. T6                         | 38.6       | 6.27  | 0.005      |                |
| T1 vs. T7                         | 51.8       | 8.41  | <0.0001    |                |
| T1 vs. T8                         | 36.3       | 5.90  | 0.0108     |                |
| T1 vs. T9                         | 50.7       | 10.64 | <0.0001    |                |
| T1 vs. T10                        | 51.5       | 8.38  | <0.0001    |                |
| T1 vs. T11                        | 47.6       | 7.73  | 0.0002     |                |
| T1 vs. T13                        | 52.7       | 8.57  | <0.0001    |                |
| T1 vs. T14                        | 48.2       | 7.83  | 0.0002     |                |
| T1 vs. T15                        | 52.1       | 8.46  | <0.0001    |                |
| T2 vs. T9                         | 25.6       | 5.38  | 0.0297     |                |
| T3 vs. T4                         | 50.4       | 8.19  | <0.0001    |                |
| T3 vs. T5                         | 53.2       | 8.65  | <0.0001    |                |
| T3 vs. T6                         | 43.1       | 7.00  | 0.0011     |                |
| T3 vs. T7                         | 56.2       | 9.14  | <0.0001    |                |
| T3 vs. T8                         | 40.7       | 6.62  | 0.0024     |                |
| T3 vs. T9                         | 55.2       | 11.57 | <0.0001    |                |
| T3 vs. T10                        | 56.0       | 9.10  | <0.0001    |                |
| T3 vs. T11                        | 52.0       | 8.46  | <0.0001    |                |
| T3 vs. T12                        | 31.4       | 5.11  | 0.0484     |                |
| T3 vs. T13                        | 57.2       | 9.29  | <0.0001    |                |
| T3 vs. T14                        | 52.6       | 8.56  | <0.0001    |                |
| T3 vs. T15                        | 56.5       | 9.19  | <0.0001    |                |

T1: 63.6 MPa - 45 degC - 75 min; T2: 200 MPa - 25 degC - 115 min; T3: 200 MPa - 25 degC - 35 min; T4: 200 MPa - 65 degC - 115 min; T5: 200 MPa - 65 degC - 35 min; T6: 400 MPa - 11.36 degC - 75 min; T7: 400 MPa - 45 degC - 142.28 min; T8: 400 MPa - 45 degC - 7.72 min; T9: 400 MPa - 45 degC - 75 min; T10: 400 MPa - 78.64 degC - 75 min; T11: 600 MPa - 25 degC - 115 min; T12: 600 MPa - 25 degC - 35 min; T13: 600 MPa - 65 degC - 115 min; T14: 600 MPa - 65 degC - 35 min; T15: 736.4 MPa - 45 degC - 75 min.

**Table S2.** Three-way ANOVA of CCD of IgG binding of HHP treated  $\beta$ -Lg.

|                             | df           | SS             | MS     | F              |
|-----------------------------|--------------|----------------|--------|----------------|
| Regression                  | 9            | 6748.36        | 749.2  | 4.61           |
| Residual                    | 10           | 1627.56        | 162.6  | Significance F |
| Total                       | 19           | 8375.92        |        | 0.013          |
|                             | Coefficients | Standard Error | t-Stat | P-value        |
| Intercept                   | 1.71E+02     | 41.61          | 4.11   | 0.00           |
| Pressure (MPa)              | -2.00E-01    | 0.10           | -2.09  | 0.06           |
| Temperature ( $^{\circ}$ C) | -2.49E+00    | 0.99           | -2.52  | 0.03           |
| Time (min)                  | -9.56E-01    | 0.47           | -2.03  | 0.07           |
| Pressure <sup>2</sup>       | 2.53E-04     | 0.00           | 3.01   | 0.01           |
| Temperature <sup>2</sup>    | 8.45E-03     | 0.01           | 1.01   | 0.34           |
| Time <sup>2</sup>           | 2.34E-03     | 0.00           | 1.12   | 0.29           |
| Pressure x Temp             | 1.67E-04     | 0.00           | 0.15   | 0.89           |
| Pressure x Time             | -6.38E-04    | 0.00           | -1.13  | 0.28           |
| Temperature x Time          | 1.42E-02     | 0.01           | 2.52   | 0.03           |

**Table S3.** Three-way ANOVA of the response surface model of  $\beta$ -Lg dimerization.

|                          | df           | SS             | MS      | F              |
|--------------------------|--------------|----------------|---------|----------------|
| Regression               | 11           | 17108.30       | 1555.30 | 9.72           |
| Residual                 | 8            | 1279.87        | 159.98  | Significance F |
| Total                    | 19           | 18388.17       |         | 0.0017         |
|                          | Coefficients | Standard Error | t Stat  | P-value        |
| Intercept                | 92.72        | 5.16           | 17.96   | <0.0001        |
| Pressure (MPa)           | 20.99        | 3.42           | 6.13    | 0.0003         |
| Temperature (°C)         | 17.54        | 3.42           | 5.12    | 0.0009         |
| Time (min)               | 7.87         | 3.42           | 2.30    | 0.0506         |
| Pressure <sup>2</sup>    | -15.09       | 4.47           | -3.37   | 0.0097         |
| Temperature <sup>2</sup> | -0.43        | 4.47           | -0.10   | 0.9252         |
| Time <sup>2</sup>        | -3.59        | 4.47           | -0.80   | 0.4455         |
| Pressure xTemp           | -16.05       | 3.33           | -4.82   | 0.0013         |
| Pressure xTime           | -2.37        | 3.33           | -0.71   | 0.4968         |
| Temperature xTime        | -6.82        | 3.33           | -2.05   | 0.0748         |

**Table S4.** Three-way ANOVA of CCD of IgG binding of HHP treated  $\alpha$ -La.

|                          | df           | SS             | MS     | F              |
|--------------------------|--------------|----------------|--------|----------------|
| Regression               | 9            | 5306.95        | 589.66 | 1.31           |
| Residual                 | 10           | 4488.02        | 448.80 | Significance F |
| Total                    | 19           | 9794.98        |        | 0.337          |
|                          | Coefficients | Standard Error | t Stat | P-value        |
| Intercept                | -5.06E+01    | 69.09          | -0.73  | 0.48           |
| Pressure (MPa)           | 2.99E-01     | 0.16           | 1.88   | 0.09           |
| Temperature (°C)         | 3.32E+00     | 1.65           | 2.02   | 0.07           |
| Time (min)               | 6.55E-01     | 0.78           | 0.84   | 0.42           |
| Pressure <sup>2</sup>    | -3.12E-04    | 0.00           | -2.24  | 0.05           |
| Temperature <sup>2</sup> | -2.34E-02    | 0.01           | -1.68  | 0.12           |
| Time <sup>2</sup>        | -3.59E-03    | 0.00           | -1.03  | 0.33           |
| Pressure x Temp          | -8.52E-04    | 0.00           | -0.45  | 0.66           |
| Pressure x Time          | 1.77E-04     | 0.00           | 0.19   | 0.85           |
| Temperature x Time       | -8.30E-03    | 0.01           | -0.89  | 0.40           |
